# Supplementary material
Source: publisher figshare collection journal article supplement (https://frontiersin.figshare.com/ndownloader/files/21932010)
Supplement: Supplementary file 1 [file 21932010]

Table S8: Model estimates for fixed effects in the stem CH4 linear mixed effect model. Interactions are indicated by *. Stem CH4 was in mg CH4-C m-2 stem SA hr-1 in the model.

|  | Value | Standard error | d.f. | t-value | p-value |
| --- | --- | --- | --- | --- | --- |
| (Intercept) | -0.00024 | 0.00016 | 45 | -1.47 | 0.15 |
| Mean monthly relative humidity | 0.00000027 | 0.0000018 | 45 | 1.48 | 0.14 |
| Sebungan | 0.0000029 | 0.000043 | 0 | 0.066 | NaN |
| Palm2 | 0.0000026 | 0.000042 | 0 | 0.062 | NaN |
| Palm3 | -0.0000024 | 0.000042 | 0 | -0.057 | NaN |
| Palm4 | -0.00012 | 0.000042 | 0 | -2.91 | NaN |
| Palm5 | 0.0000027 | 0.000042 | 0 | 0.065 | NaN |
| WTD | 0.00000037 | 0.00000072 | 45 | 0.51 | 0.61 |
| Soil moisture | -0.000000014 | 0.000000020 | 45 | -0.69 | 0.49 |
| Soil temperature | 0.0000086 | 0.0000055 | 45 | 1.56 | 0.13 |
| Air temperature | -0.000000043 | 0.000000063 | 45 | -0.69 | 0.49 |
| Mean monthly relative humidity * Sebungan | -0.000000089 | 0.00000049 | 45 | -0.18 | 0.85 |
| Mean monthly relative humidity * palm2 | -0.000000040 | 0.00000047 | 45 | -0.084 | 0.93 |
| Mean monthly relative humidity * palm3 | 0.000000029 | 0.00000047 | 45 | 0.061 | 0.95 |
| Mean monthly relative humidity * palm4 | 0.0000014 | 0.00000047 | 45 | 2.89 | 0.0059 |
| Mean monthly relative humidity * palm5 | -0.000000038 | 0.00000047 | 45 | -0.082 | 0.94 |
| Sebungan * palm2 | -0.00000019 | 0.000052 | 0 | -0.0037 | NaN |
| Sebungan * palm 3 | -0.000019 | 0.000057 | 0 | -0.34 | NaN |
| Sebungan * palm4 | 0.00017 | 0.000056 | 0 | 3.00 | NaN |
| Sebungan * palm5 | -0.0000097 | 0.000053 | 0 | -0.18 | NaN |
| Sebungan *  soil moisture (0 – 10 cm) | 0.000000063 | 0.000000062 | 45 | 1.01 | 0.32 |
| Palm2 *  soil moisture (0 – 10 cm) | 0.000000039 | 0.000000031 | 45 | 1.28 | 0.21 |
| Palm3 *  soil moisture (0 – 10 cm) | 0.00000000037 | 0.000000030 | 45 | 0.012 | 0.99 |
| Palm4 *  soil moisture (0 – 10 cm) | 0.000000017 | 0.000000031 | 45 | 5.67 | 0 |
| Palm5 *  soil moisture (0 – 10 cm) | 0.000000025 | 0.000000031 | 45 | 0.80 | 0.43 |
| Mean monthly relative humidity *  soil temperature | -0.000000097 | 0.000000062 | 45 | -1.55 | 0.13 |
| Sebungan * air temperature | 0.0000001.3 | 0.00000011 | 45 | 1.12 | 0.27 |
| Mean monthly relative humidity * Sebungan * palm2 | -0.00000000017 | 0.00000059 | 45 | -0.00028 | 1.00 |
| Mean monthly relative humidity * Sebungan * palm3 | 0.00000022 | 0.00000064 | 45 | 0.34 | 0.74 |
| Mean monthly relative humidity * Sebungan * palm4 | -0.0000019 | 0.00000064 | 45 | -2.98 | 0.0047 |
| Mean monthly relative humidity * Sebungan * palm5 | 0.00000013 | 0.00000060 | 45 | 0.22 | 0.83 |
| Sebungan * palm2 *  soil moisture (0 – 10 cm) | 0.00000015 | 0.000000099 | 45 | 1.50 | 0.14 |
| Sebungan * palm3 *  soil moisture (0 – 10 cm) | 0.000000036 | 0.00000012 | 45 | 0.31 | 0.76 |
| Sebungan * palm4 *  soil moisture (0 – 10 cm) | -0.00000011 | 0.000000074 | 45 | -1.47 | 0.15 |
| Sebungan * palm5 *  soil moisture (0 – 10 cm) | -0.00000010 | 0.000000097 | 45 | -1.05 | 0.30 |
